# Supplementary material
Source: publisher figshare collection journal article supplement (https://tandf.figshare.com/ndownloader/files/12833207)
Supplement: Supplementary file 1 [file 12833207]

# Effectiveness of Mobile Application for Menstrual Management of Working Women in Japan: Randomized Controlled Trial and Medical Economic Evaluation

## Supplementary Material

**Figure S1.** Distribution of age group

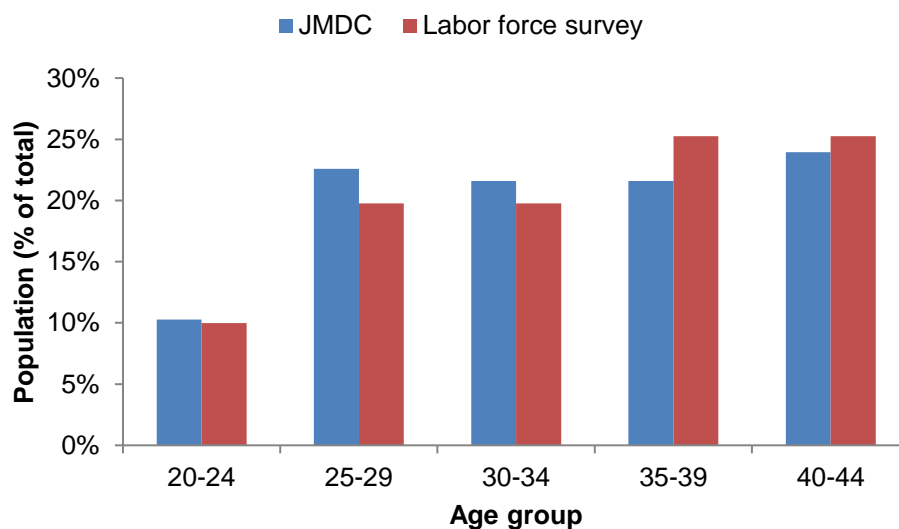

JMDC: Japan Medical Data Center.

**Figure S2.** Monthly incidence of dysmenorrhea (A) and depression (B) by (a) calendar year month and (b) age.

A.

(a)

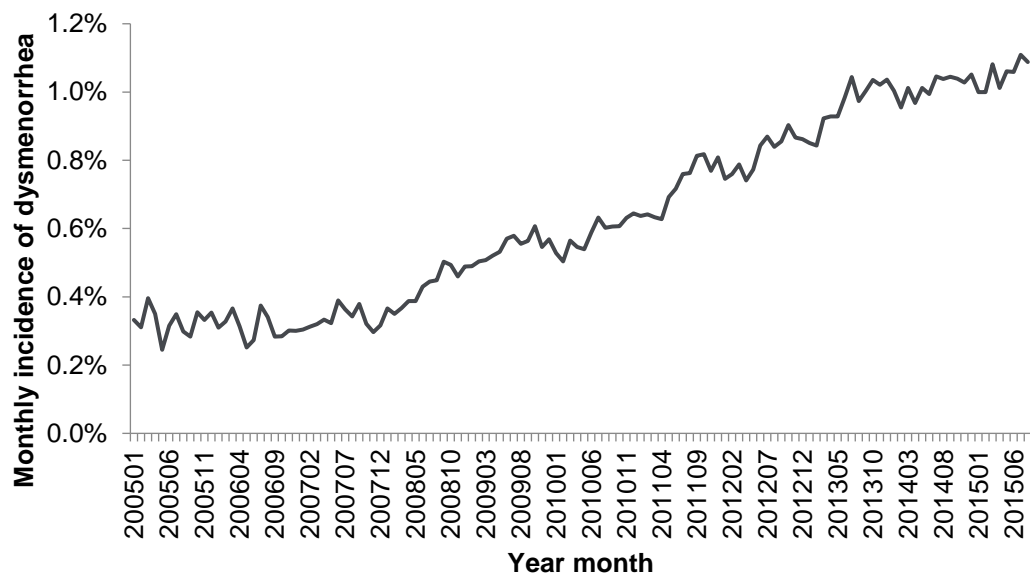

(b)

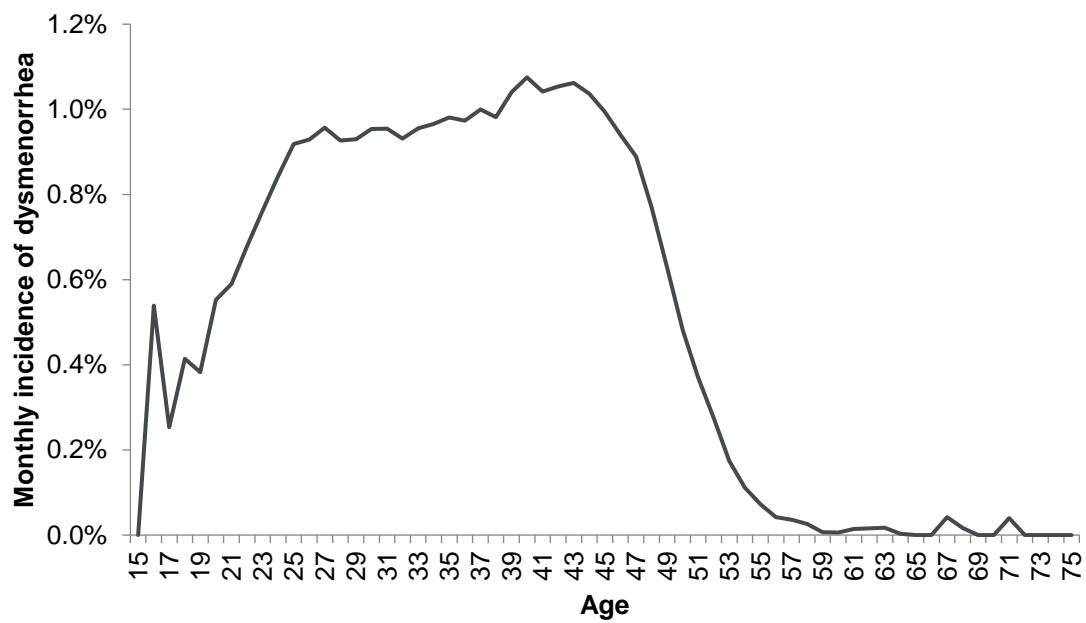

**Figure S2.** (cont'd)

B.

(a)

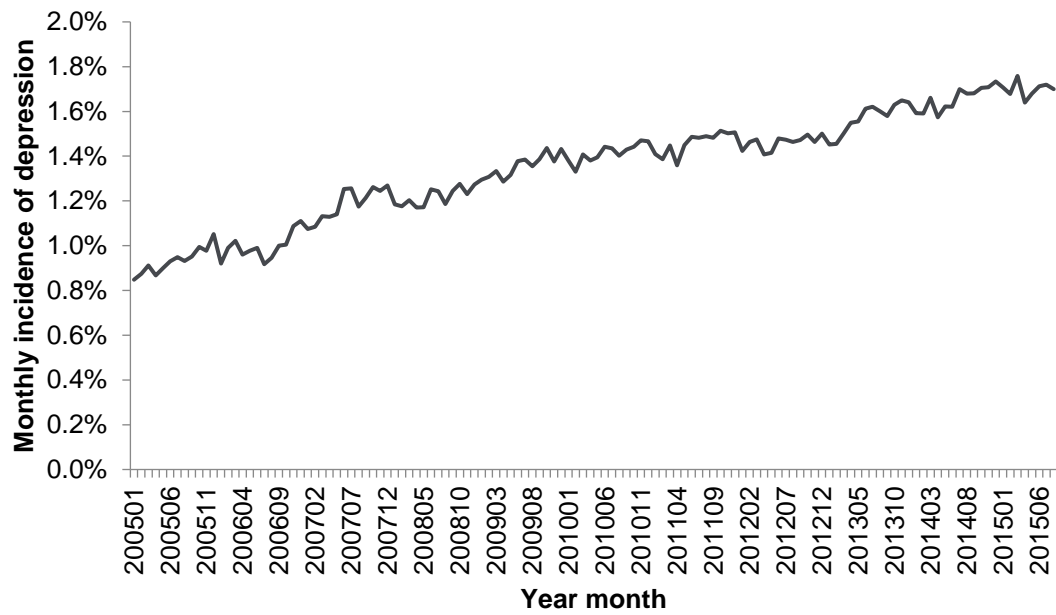

(b)

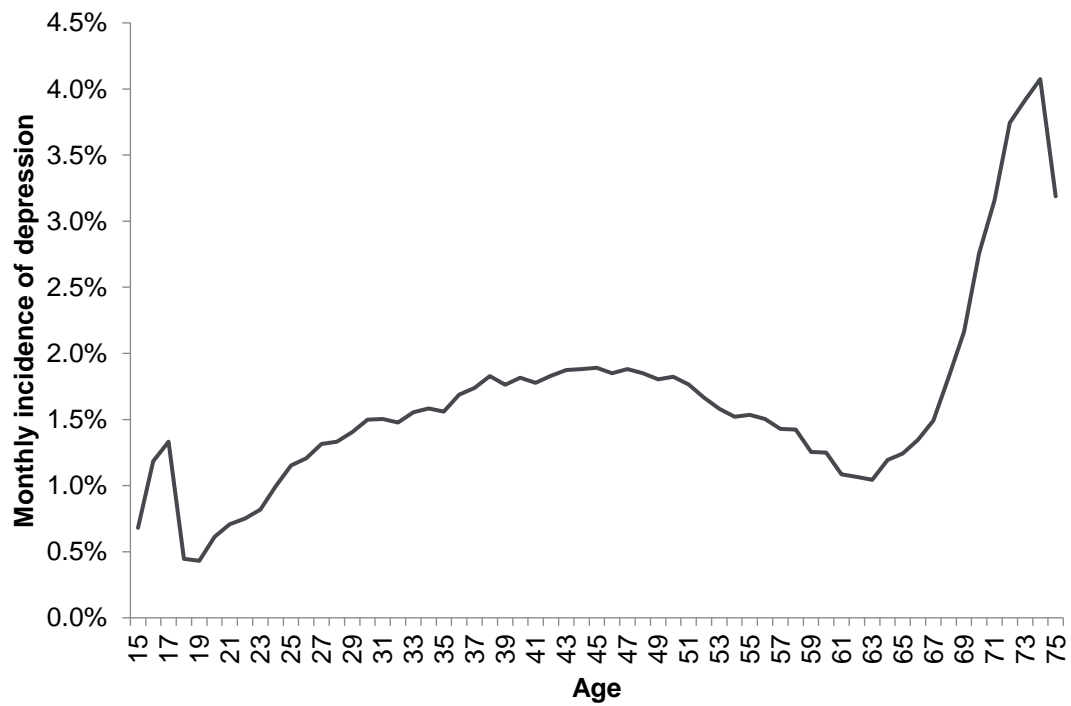

**Figure S3.** (A) Medical expense of all insured females and (B) relative medical expense of dysmenorrhea and depression for those without symptoms, by age group.

A.

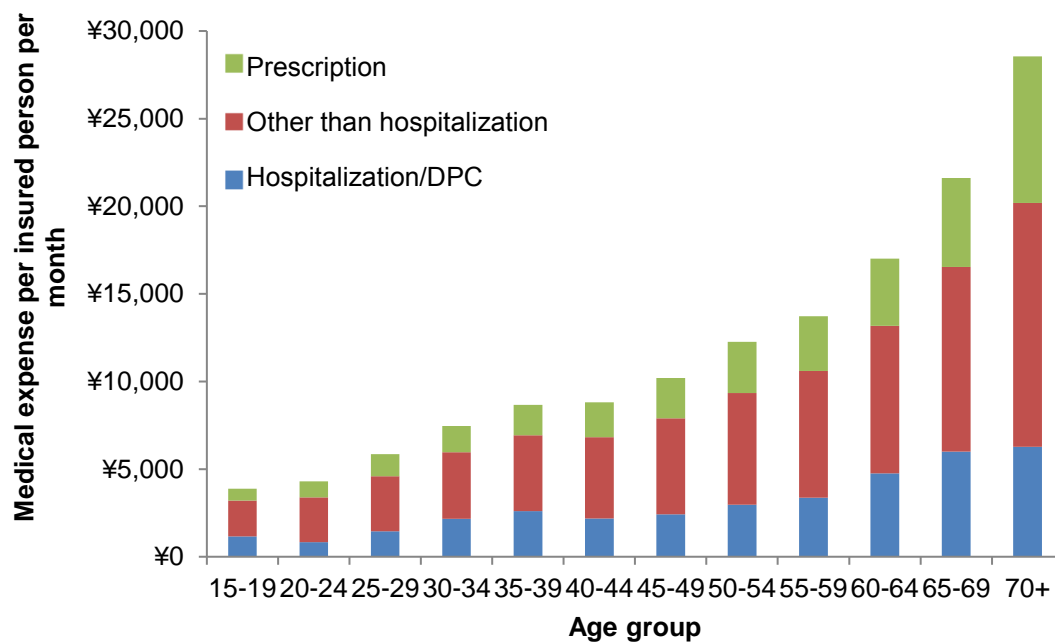

B.

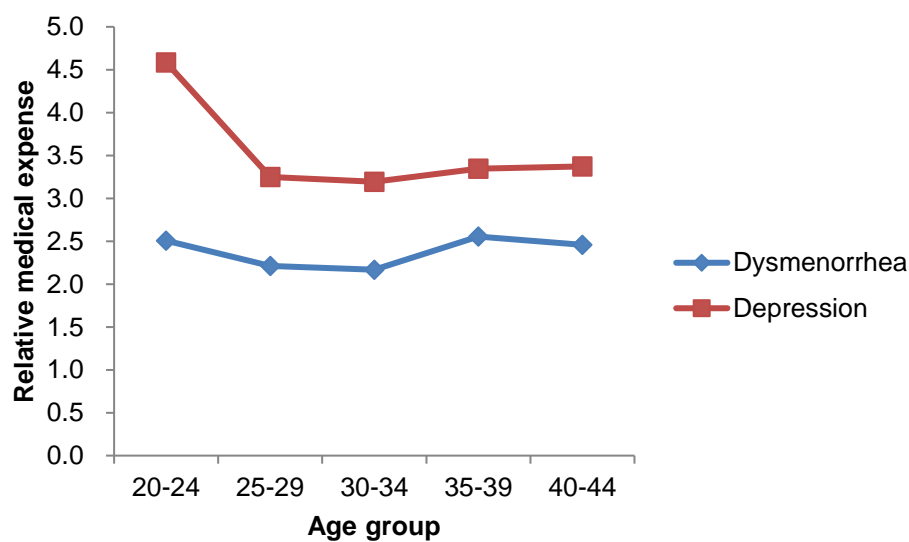

**Figure S4.** Monthly resignation rate

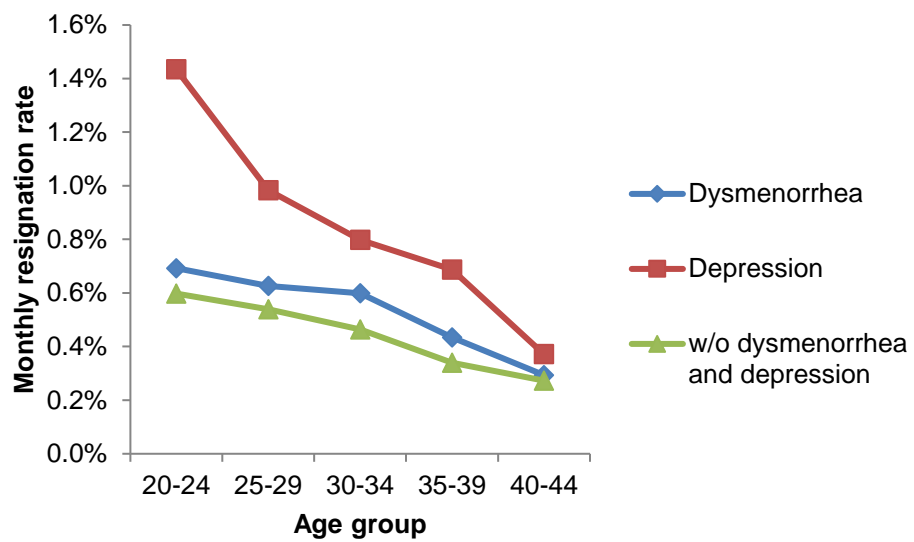

**Table S1.** Severity of depression based on PHQ-9 score [1,2] (underline: p<0.05)

| Severity          |           | Control group | Intervention group | P value      |
|-------------------|-----------|---------------|--------------------|--------------|
| (Total score)     |           | N=914         | N=612              |              |
| None              | Baseline  | 57%           | 56%                | 0.376        |
| (0-4)             | 1st month | 48%           | 43%                | <u>0.036</u> |
| %                 | 2nd month | 43%           | 44%                | 0.385        |
|                   | 3rd month | 44%           | 41%                | 0.212        |
| Mild              | Baseline  | 25%           | 28%                | 0.171        |
| (5-9)             | 1st month | 21%           | 22%                | 0.312        |
| %                 | 2nd month | 19%           | 17%                | 0.231        |
|                   | 3rd month | 18%           | 18%                | 0.399        |
| Moderate          | Baseline  | 12%           | 11%                | 0.235        |
| (10-14)           | 1st month | 10%           | 8%                 | 0.270        |
| %                 | 2nd month | 9%            | 6%                 | 0.063        |
|                   | 3rd month | 9%            | 5%                 | <u>0.002</u> |
| Moderately severe | Baseline  | 4%            | 5%                 | 0.384        |
| (15-19)           | 1st month | 4%            | 2%                 | <u>0.028</u> |
| %                 | 2nd month | 4%            | 2%                 | <u>0.035</u> |
|                   | 3rd month | 3%            | 3%                 | 0.314        |
| Severe            | Baseline  | 2%            | 1%                 | 0.162        |
| (20-27)           | 1st month | 1%            | 1%                 | 0.399        |
| %                 | 2nd month | 2%            | 2%                 | 0.333        |
|                   | 3rd month | 2%            | 1%                 | 0.085        |

**Table S2.** Contents of questionnaire

| No | Item             | Question                                                                                                                                                                                                                                                                                                                                                                                                                              | Answer                                                   |
|----|------------------|---------------------------------------------------------------------------------------------------------------------------------------------------------------------------------------------------------------------------------------------------------------------------------------------------------------------------------------------------------------------------------------------------------------------------------------|----------------------------------------------------------|
| Q1 | Condition        | In the last seven days, did you have any symptoms, and how much have you been bothered by the symptoms?<br><br>[1. stomachache, 2. backache, 3. tension in the breast, 4. swelling, 5. easily get tired, 6. feel weary, 7. rough skin, 8. headache, 9. constipation, 10. stiff shoulder, 11. nausea, 12. dizzy, 13. become irritated, 14. state of depression, 15. increased food appetite, 16. sleepiness, 17. decreased motivation] | 0: no<br><br>1: weak<br><br>2: moderate<br><br>3: severe |
| Q2 | Menstrual period | When was the first day of last menstrual period?                                                                                                                                                                                                                                                                                                                                                                                      | year( ), month ( ),<br><br>day( )                        |
| Q3 | Pregnancy        | Are you pregnant?                                                                                                                                                                                                                                                                                                                                                                                                                     | Yes, no                                                  |
| Q4 | WPAI [3]         | Are you currently employed (working for pay)?                                                                                                                                                                                                                                                                                                                                                                                         | Yes, no                                                  |
| Q5 |                  | During the past seven days (excluding today), how many hours did you miss from work because of your health problems? Include hours you missed on sick days, times you went in late, left early, etc., because of your health problems.                                                                                                                                                                                                | ( ) hours                                                |
| Q6 |                  | During the past seven days, how many hours did you miss from work because of any other reason, such as vacation, holidays?                                                                                                                                                                                                                                                                                                            | ( ) hours                                                |

**Table S2.** (cont'd)

| No | Item     | Question                                                                                                                                                                                                                                                                                                                                                                                                                        | Answer                                                                                                   |
|----|----------|---------------------------------------------------------------------------------------------------------------------------------------------------------------------------------------------------------------------------------------------------------------------------------------------------------------------------------------------------------------------------------------------------------------------------------|----------------------------------------------------------------------------------------------------------|
| Q7 | WPAI [3] | During the past seven days, how many hours did you actually work?                                                                                                                                                                                                                                                                                                                                                               | ( ) hours                                                                                                |
| Q8 |          | During the past seven days, how much did health problems affect your productivity while you were working? Think about days you were limited in the amount or kind of work you could do, days you accomplished less than you would like, or days you could not do your work as carefully as you usually do.                                                                                                                      | 0 (health problems did not affect my productivity)<br>-10 (health problems completely disturbed my work) |
| Q9 |          | During the past seven days, how much did health problems affect your ability to do your regular daily activities, other than work at a job? By regular activities, we mean the usual activities you do, such as work around the house, shopping, childcare, exercising, studying, etc. Think about times you were limited in the amount or kind of activities you could do and times you accomplished less than you would like. | 0 (health problems did not affect my productivity)<br>-10 (health problems completely disturbed my work) |



**Table S2.** (cont'd)

| No  | Item       | Question                                          | Answer                                                                                                                                                                                |
|-----|------------|---------------------------------------------------|---------------------------------------------------------------------------------------------------------------------------------------------------------------------------------------|
| Q10 | Diseases   | Did you visit a doctor during the past one month? | <p>Yes</p> <p>(Select all diseases):</p> <p>Dysmenorrhea,</p> <p>PMS,</p> <p>Depression,</p> <p>Sleep disorder,</p> <p>Others ( )</p> <p>No</p>                                       |
| Q11 | Medication | Do you have any drugs prescribed by a doctor?     | <p>Yes</p> <p>(Select all drugs):</p> <p>Chinese</p> <p>medicine,</p> <p>Hormone drug,</p> <p>Antidepressants,</p> <p>Sleeping pills,</p> <p>Medicine for</p> <p>ulcers</p> <p>No</p> |

PMS, premenstrual syndrome.

**Table S2.** (cont'd)

| No  | Item        | Question                                                                                                                                                                                                                                                                                                                                                                                                                                                                                                                                                                                                                                                                                                                                                                                 | Answer                                                                                |
|-----|-------------|------------------------------------------------------------------------------------------------------------------------------------------------------------------------------------------------------------------------------------------------------------------------------------------------------------------------------------------------------------------------------------------------------------------------------------------------------------------------------------------------------------------------------------------------------------------------------------------------------------------------------------------------------------------------------------------------------------------------------------------------------------------------------------------|---------------------------------------------------------------------------------------|
| Q12 | PHQ-9 [1,2] | Over the last 2 weeks, how often have you been bothered by any of the following problems?<br>[1. Little interest or pleasure in doing things; 2. Feeling down, depressed, or hopeless; 3. Trouble falling or staying asleep, or sleeping too much; 4. Feeling tired or having little energy; 5. Poor appetite or overeating; 6. Feeling bad about yourself — or that you are a failure or have let yourself or your family down; 7. Trouble concentrating on things, such as reading the newspaper or watching television; 8. Moving or speaking so slowly that other people could have noticed? Or the opposite — being so fidgety or restless that you have been moving around a lot more than usual; 9. Thoughts that you would be better off dead or of hurting yourself in some way | 0: not at all<br>1: several days<br>2: more than half the days<br>3: nearly every day |

**Table S2.** (cont'd)

| No  | Item | Question                                                                                                                                                         | Answer                                                                                          |
|-----|------|------------------------------------------------------------------------------------------------------------------------------------------------------------------|-------------------------------------------------------------------------------------------------|
| Q13 |      | If you checked off any problems, how difficult have these problems made it for you to do your work, take care of things at home, or get along with other people? | 0: not difficult at all<br>1: somewhat difficult<br>2: very difficult<br>3: extremely difficult |

**Table S3.** Incidence of each symptom by sensitivity analysis with PPS (underline:  $p < 0.05$ )

|               |           | Control group | Intervention group | P value      |
|---------------|-----------|---------------|--------------------|--------------|
| Incidence (%) |           |               |                    |              |
| Dysmenorrhea  | 1st month | 1.1%          | 0.9%               | 0.370        |
|               | 2nd month | 1.4%          | 1.2%               | 0.346        |
|               | 3rd month | 1.7%          | 0.5%               | <u>0.019</u> |
| PMS           | 1st month | 1.3%          | 1.3%               | 0.488        |
|               | 2nd month | 1.7%          | 0.7%               | 0.054        |
|               | 3rd month | 1.0%          | 1.4%               | 0.263        |
| Depression    | 1st month | 0.5%          | 0.4%               | 0.407        |
|               | 2nd month | 1.0%          | 0.2%               | <u>0.041</u> |
|               | 3rd month | 1.0%          | 0.2%               | <u>0.044</u> |

PPS, per protocol set; PMS, premenstrual syndrome.

**Table S4.** Physical conditions (underline:  $p<0.05$ )

| Index                      | Control group   | Intervention group | P-value |
|----------------------------|-----------------|--------------------|---------|
|                            | N=914           | N=612              |         |
| Baseline, average $\pm$ SD |                 |                    |         |
| Stomach ache               | 1.83 $\pm$ 0.96 | 1.80 $\pm$ 0.95    | 0.227   |
| Backache                   | 1.89 $\pm$ 0.94 | 1.86 $\pm$ 0.92    | 0.291   |
| Tension in the breast      | 1.50 $\pm$ 0.82 | 1.45 $\pm$ 0.78    | 0.137   |
| Swelling                   | 2.07 $\pm$ 1.02 | 2.04 $\pm$ 1.00    | 0.312   |
| Easily get tired           | 2.62 $\pm$ 1.00 | 2.61 $\pm$ 0.99    | 0.417   |
| Feel weary                 | 2.43 $\pm$ 1.01 | 2.38 $\pm$ 1.01    | 0.195   |
| Rough skin                 | 2.19 $\pm$ 0.95 | 2.12 $\pm$ 0.97    | 0.073   |
| Headache                   | 2.00 $\pm$ 1.02 | 1.93 $\pm$ 1.00    | 0.070   |
| Constipation               | 1.95 $\pm$ 1.03 | 1.94 $\pm$ 1.05    | 0.446   |
| Stiff shoulder             | 2.75 $\pm$ 1.09 | 2.73 $\pm$ 1.08    | 0.361   |
| Nausea                     | 1.36 $\pm$ 0.71 | 1.31 $\pm$ 0.66    | 0.080   |
| Dizzy                      | 1.39 $\pm$ 0.73 | 1.37 $\pm$ 0.68    | 0.310   |
| Become irritated           | 2.17 $\pm$ 1.05 | 2.13 $\pm$ 1.04    | 0.264   |
| State of depression        | 1.83 $\pm$ 0.96 | 1.84 $\pm$ 0.96    | 0.408   |
| Increased food appetite    | 2.01 $\pm$ 1.06 | 2.08 $\pm$ 1.06    | 0.118   |
| Sleepiness                 | 2.59 $\pm$ 1.03 | 2.65 $\pm$ 1.01    | 0.141   |
| Decreased motivation       | 2.21 $\pm$ 1.03 | 2.26 $\pm$ 1.05    | 0.200   |

SD: standard deviation.

**Table S4 (cont'd)**

| Index                       | Control group   | Intervention group | P-value      |
|-----------------------------|-----------------|--------------------|--------------|
|                             | N=914           | N=612              |              |
| 1st month, average $\pm$ SD |                 |                    |              |
| Stomach ache                | 1.81 $\pm$ 0.93 | 1.86 $\pm$ 0.93    | 0.158        |
| Backache                    | 1.90 $\pm$ 0.93 | 1.95 $\pm$ 0.94    | 0.174        |
| Tension in the breast       | 1.50 $\pm$ 0.79 | 1.59 $\pm$ 0.87    | <u>0.019</u> |
| Swelling                    | 2.17 $\pm$ 1.01 | 2.05 $\pm$ 0.99    | <u>0.014</u> |
| Easily get tired            | 2.62 $\pm$ 0.99 | 2.60 $\pm$ 0.97    | 0.343        |
| Feel weary                  | 2.42 $\pm$ 1.00 | 2.45 $\pm$ 0.99    | 0.326        |
| Rough skin                  | 2.20 $\pm$ 0.92 | 2.18 $\pm$ 0.97    | 0.364        |
| Headache                    | 2.02 $\pm$ 1.02 | 2.01 $\pm$ 1.00    | 0.419        |
| Constipation                | 1.96 $\pm$ 1.04 | 1.93 $\pm$ 1.04    | 0.251        |
| Stiff shoulder              | 2.79 $\pm$ 1.07 | 2.76 $\pm$ 1.05    | 0.296        |
| Nausea                      | 1.36 $\pm$ 0.70 | 1.35 $\pm$ 0.72    | 0.447        |
| Dizzy                       | 1.44 $\pm$ 0.73 | 1.43 $\pm$ 0.72    | 0.359        |
| Become irritated            | 2.20 $\pm$ 1.06 | 2.20 $\pm$ 1.04    | 0.487        |
| State of depression         | 1.87 $\pm$ 1.00 | 1.89 $\pm$ 1.00    | 0.344        |
| Increased food appetite     | 2.07 $\pm$ 1.04 | 2.12 $\pm$ 1.06    | 0.183        |
| Sleepiness                  | 2.63 $\pm$ 1.03 | 2.62 $\pm$ 1.01    | 0.394        |
| Decreased motivation        | 2.15 $\pm$ 1.02 | 2.16 $\pm$ 1.03    | 0.431        |

**Table S4 (cont'd)**

| Index                   | Control group | Intervention group | P-value      |
|-------------------------|---------------|--------------------|--------------|
|                         | N=914         | N=612              |              |
| 2nd month, average±SD   |               |                    |              |
| Stomach ache            | 1.79±0.90     | 1.76±0.91          | 0.238        |
| Backache                | 1.89±0.93     | 1.90±0.97          | 0.411        |
| Tension in the breast   | 1.60±0.84     | 1.53±0.82          | 0.052        |
| Swelling                | 2.20±1.02     | 2.18±1.01          | 0.363        |
| Easily get tired        | 2.63±1.00     | 2.64±1.00          | 0.404        |
| Feel weary              | 2.46±1.00     | 2.43±0.98          | 0.300        |
| Rough skin              | 2.20±0.95     | 2.13±0.94          | 0.058        |
| Headache                | 2.00±1.00     | 1.92±0.96          | 0.056        |
| Constipation            | 1.97±1.02     | 1.87±1.02          | <u>0.031</u> |
| Stiff shoulder          | 2.76±1.08     | 2.66±1.11          | <u>0.033</u> |
| Nausea                  | 1.37±0.70     | 1.28±0.61          | <u>0.004</u> |
| Dizzy                   | 1.43±0.72     | 1.41±0.71          | 0.299        |
| Become irritated        | 2.24±1.05     | 2.16±1.02          | 0.090        |
| State of depression     | 1.86±1.03     | 1.78±0.94          | 0.065        |
| Increased food appetite | 2.07±1.02     | 2.01±1.05          | 0.164        |
| Sleepiness              | 2.64±1.03     | 2.61±1.07          | 0.298        |
| Decreased motivation    | 2.19±1.06     | 2.14±1.02          | 0.179        |

**Table S4 (cont'd)**

| Index                       | Control group   | Intervention group | P-value      |
|-----------------------------|-----------------|--------------------|--------------|
|                             | N=914           | N=612              |              |
| 3rd month, average $\pm$ SD |                 |                    |              |
| Stomach ache                | 1.80 $\pm$ 0.90 | 1.76 $\pm$ 0.90    | 0.176        |
| Backache                    | 1.92 $\pm$ 0.94 | 1.92 $\pm$ 0.93    | 0.497        |
| Tension in the breast       | 1.60 $\pm$ 0.86 | 1.60 $\pm$ 0.88    | 0.460        |
| Swelling                    | 2.21 $\pm$ 1.01 | 2.16 $\pm$ 1.02    | 0.178        |
| Easily get tired            | 2.64 $\pm$ 1.00 | 2.67 $\pm$ 0.99    | 0.317        |
| Feel weary                  | 2.53 $\pm$ 0.99 | 2.51 $\pm$ 0.99    | 0.371        |
| Rough skin                  | 2.22 $\pm$ 0.94 | 2.17 $\pm$ 0.95    | 0.162        |
| Headache                    | 2.08 $\pm$ 1.04 | 1.94 $\pm$ 0.96    | <u>0.003</u> |
| Constipation                | 1.88 $\pm$ 1.00 | 1.85 $\pm$ 1.01    | 0.263        |
| Stiff shoulder              | 2.75 $\pm$ 1.11 | 2.61 $\pm$ 1.06    | <u>0.007</u> |
| Nausea                      | 1.37 $\pm$ 0.71 | 1.32 $\pm$ 0.67    | 0.068        |
| Dizzy                       | 1.46 $\pm$ 0.75 | 1.42 $\pm$ 0.69    | 0.143        |
| Become irritated            | 2.18 $\pm$ 1.05 | 2.13 $\pm$ 1.04    | 0.215        |
| State of depression         | 1.85 $\pm$ 1.00 | 1.81 $\pm$ 0.99    | 0.225        |
| Increased food appetite     | 1.88 $\pm$ 0.98 | 1.99 $\pm$ 1.08    | <u>0.017</u> |
| Sleepiness                  | 2.58 $\pm$ 1.05 | 2.67 $\pm$ 1.02    | <u>0.048</u> |
| Decreased motivation        | 2.16 $\pm$ 1.02 | 2.15 $\pm$ 1.03    | 0.463        |



**Table S5.** Absenteeism calculated from the JMDC data

|                                             |                                                 | Dysmenorrhea | Depression |
|---------------------------------------------|-------------------------------------------------|--------------|------------|
| Hospitalization                             | Annual incidence of hospitalization             | 7.4%         | 6.6%       |
|                                             | (%)                                             |              |            |
|                                             | Average length of hospital stay per year (days) | 9.4          | 18.0       |
|                                             | Number of days per month (days)                 | 0.69         | 1.19       |
| Hospital visit                              | Days per year (days)                            | 12.2         | 17.3       |
| Days off due to the symptom                 |                                                 | 6.8          | 9.8        |
| (hospitalization+(hospital visit/2)) (days) |                                                 |              |            |
| Annual working days (days)                  |                                                 | 251.6        | 251.6      |
| Absenteeism (%)                             |                                                 | 2.7%         | 3.9%       |
| JMDC: Japan Medical Data Center.            |                                                 |              |            |

**References:**

1. Spitzer RL, Kroenke K, Williams JB. Validation and utility of a self-report version of PRIME-MD: the PHQ primary care study. Primary Care Evaluation of Mental Disorders. Patient Health Questionnaire. JAMA. 1999;282(18):1737-1744.
2. Muramatsu K, Miyaoka H, Kamijima K, et al. The patient health questionnaire, Japanese version: validity according to the mini-international neuropsychiatric interview-plus. Psychol Rep. 2007;101(3 Pt 1):952-960.
3. Reilly MC, Zbrozek AS, Dukes EM. The validity and reproducibility of a work productivity and activity impairment instrument. Pharmacoeconomics. 1993;4(5):353-365.
